# Supplementary material
Source: Springer Nature journal article supplement (https://www.springermedizin.de/resource/supplementary/12943_2010_680_MOESM3_ESM.pdf/9554566)

**A**

|                          |   |   |   |   |   |   |   |
|--------------------------|---|---|---|---|---|---|---|
| Protein Lysate           | - | + | + | + | + | + | + |
| Probe                    | + | + | + | + | + | + | + |
| Competitor               | - | - | + | - | - | - | - |
| DMSO                     | - | - | - | + | + | + | - |
| FLLL32 ( $\mu\text{M}$ ) | - | - | - | - | 2 | 4 | - |
| STAT3 Ab                 | - | - | - | - | - | - | + |

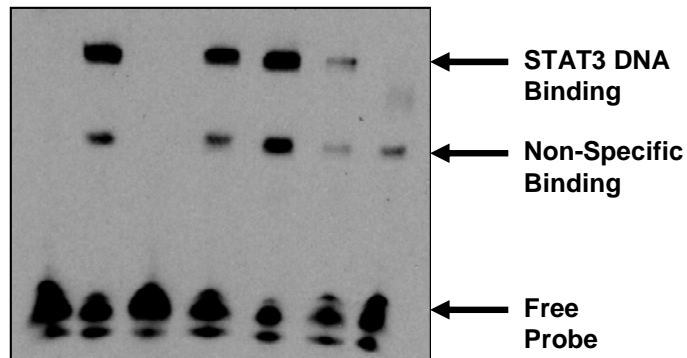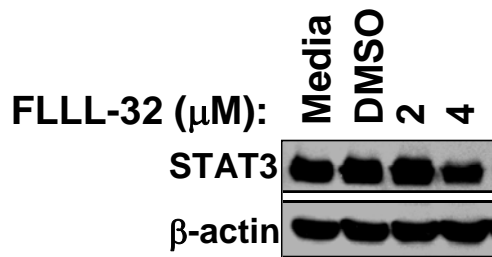**B**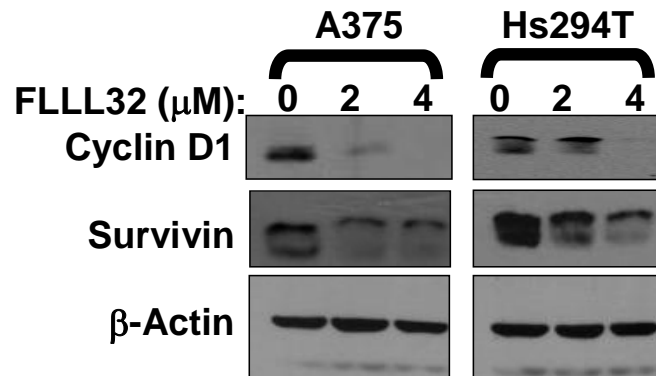

Supplement: MOESM3 [file 9554566]
